# Supplementary material for: Photocurrent responsive films prepared from a nickel-dithiolate compound with directly bonded pyridyl groups
Source: Royal Society of Chemistry journal article supplement (doi:10.1039/c4ra10991k), 2014-01-01
Supplement: c4ra10991k1.pdf [file c4ra10991k1.pdf]

## Supporting Materials

### **Photocurrent responsive films prepared by nickel-dithiolate compound with directly bonded pyridyl group**

**Wei-Chun Shen, Peng Huo, Yu-De Huang, Jing-Xue Yin, Qin-Yu Zhu\* and Jie Dai\***

**Figure S1.** Photo of the flower-like crystals of **2**.

**Figure S2.** XRD of the crystal sample obtained by exchange method and the powder sample obtained by direct synthetic method.

**Figure S3.** FTIR spectra of **1** and **2** in 400–1000  $\text{cm}^{-1}$  range.

**Figure S4.** FTIR spectra of the metal ion treated films.

**Figure S5.** EDS results of the metal ions treated film **1**, (a) Mn(II), (b) Co(II), (c) Zn(II), and (d) Fe(III).

**Figure S6.** I-V curves of film **1** with and without irradiation.

**Figure S7.** The photocurrent responses of **1** to the morphologies obtained in different solvents (a) acetone, (b) methanol, (c) acetonitrile and (d) THF.

**Figure S8.** Photocurrent response of Fe(II) treated **1**.

**Figure S9.** FTIR spectra of the metal ion treated films of non coordination [*n*-Bu<sub>4</sub>N][Ni(Phdt)<sub>2</sub>].

**Figure S10.** EDS results of the metal ions treated film of [*n*-Bu<sub>4</sub>N][Ni(Phdt)<sub>2</sub>], (a) Mn(II), (b) Co(II), and (c) Zn(II).

**Figure S11.** Photocurrent responses of **3** and the metal ions treated **3**.

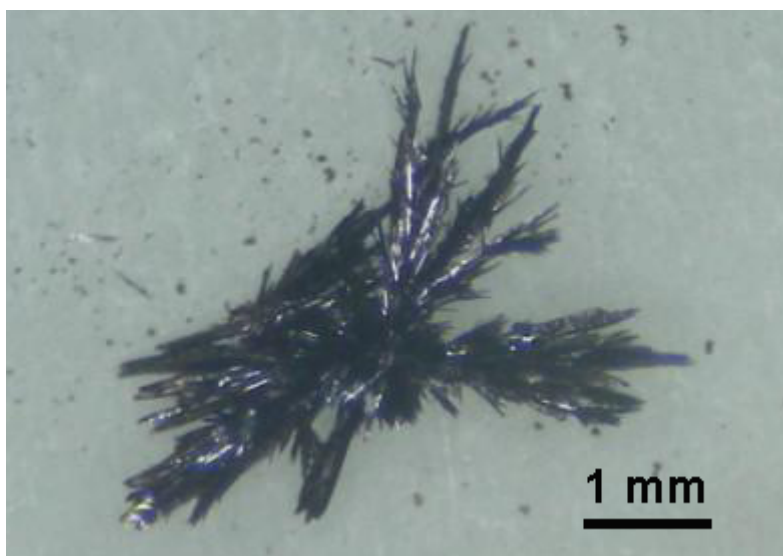

**Figure S1.** Photo of the flower-like crystals of **2**.

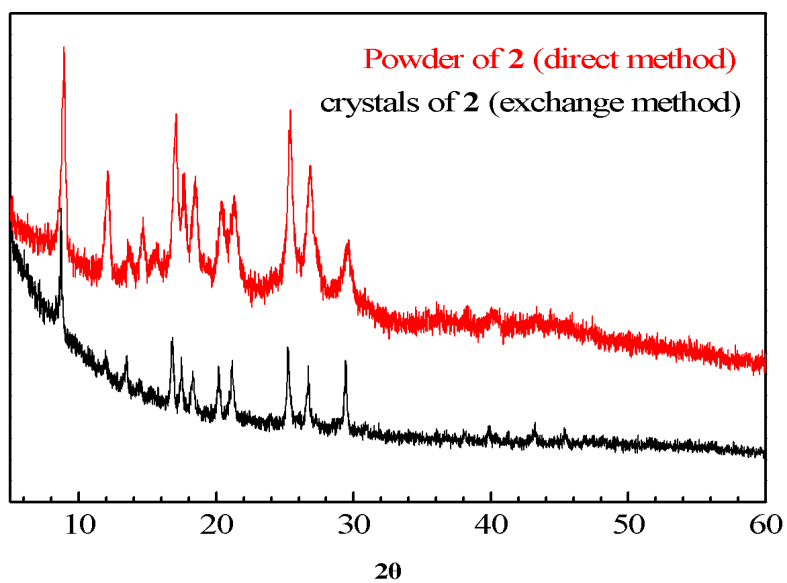

**Figure S2.** XRD of the crystal sample obtained by exchange method and the powder sample obtained by direct synthetic method.

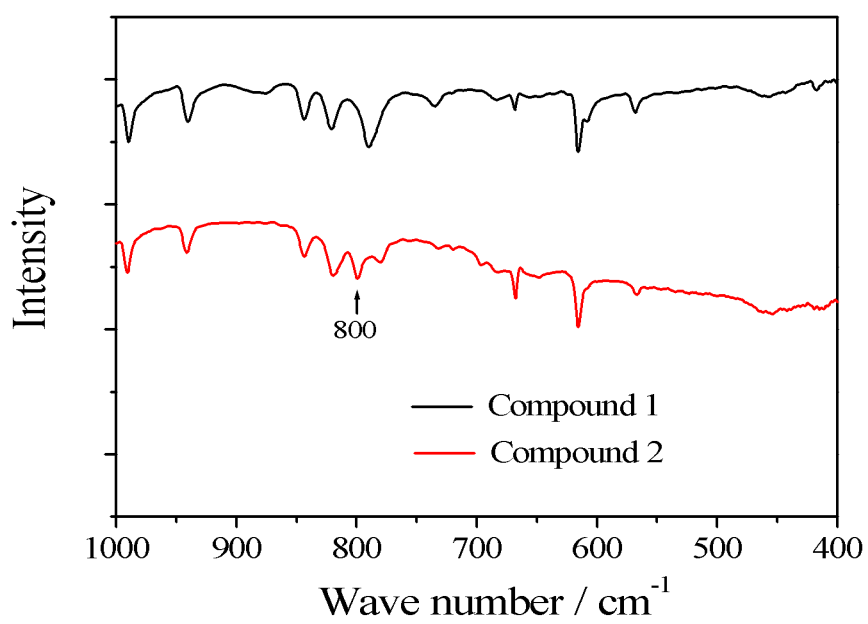

**Figure S3.** FTIR spectra of **1** and **2** in 400–1000 cm<sup>-1</sup> range.

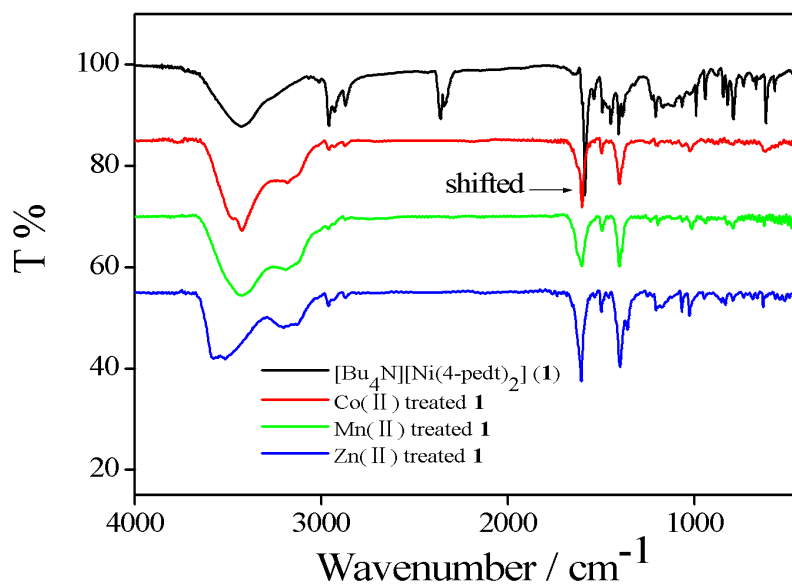

(a)

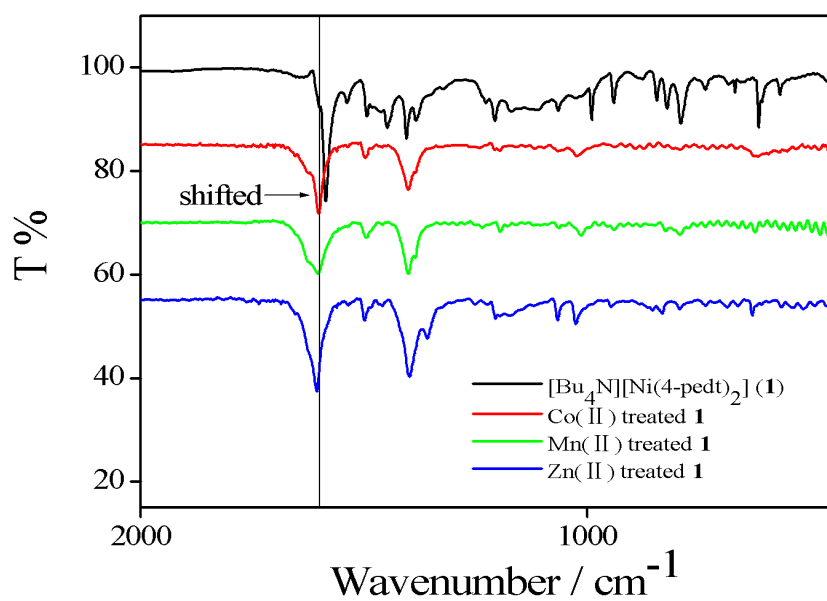

(b)

**Figure S4.** FTIR spectra of the metal ion treated films.

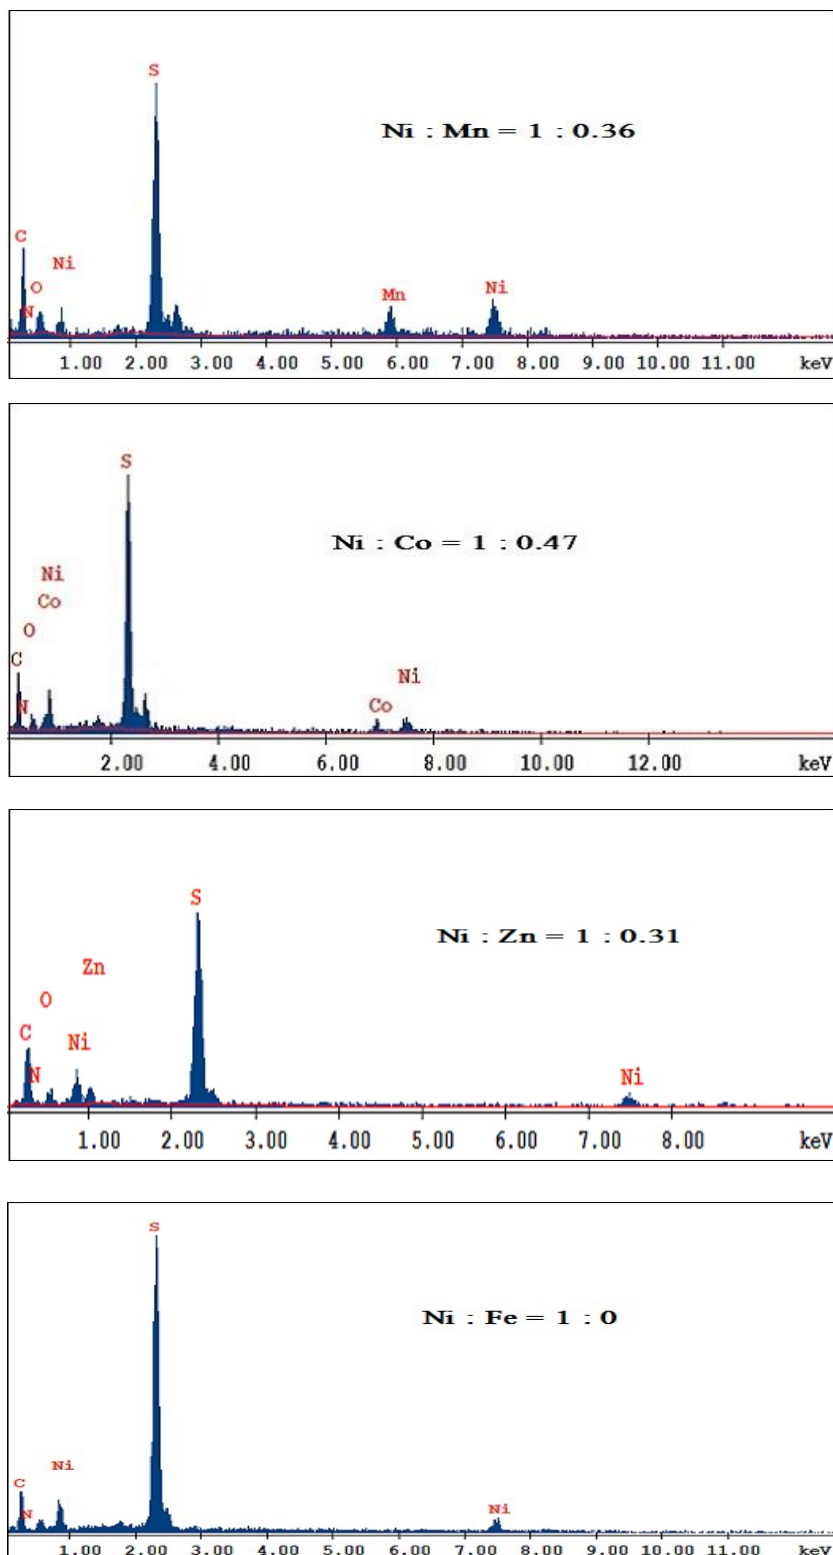

**Figure S5.** EDS results of the metal ions treated film **1**, (a) Mn(II), (b) Co(II), (c) Zn(II), and (d) Fe(III).

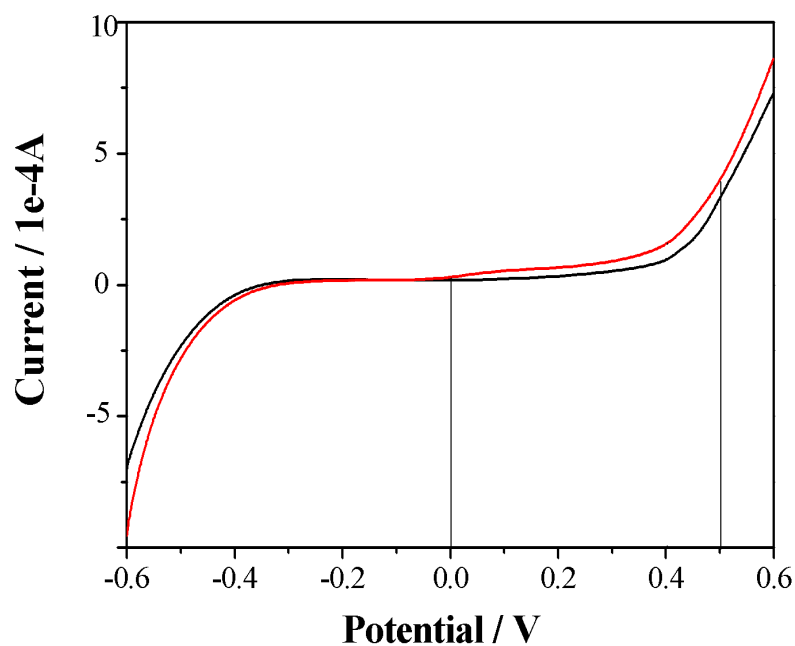

**Figure S6.** I-V curves of film **1** with and without irradiation.

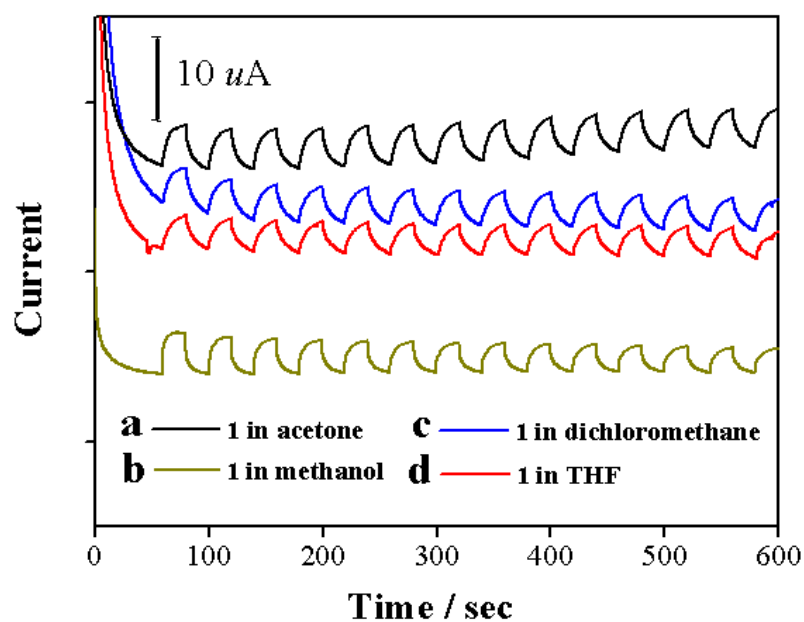

**Figure S7.** The photocurrent responses of **1** to the morphologies obtained in different solvents (a) acetone, (b) methanol, (c) dichloromethane and (d) THF.

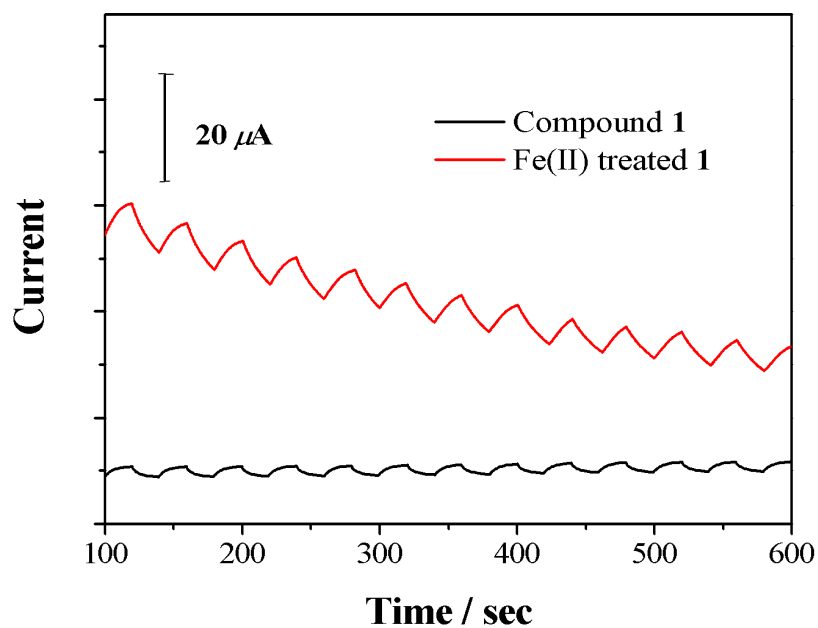

**Figure S8.** Photocurrent response of Fe(II) treated 1.

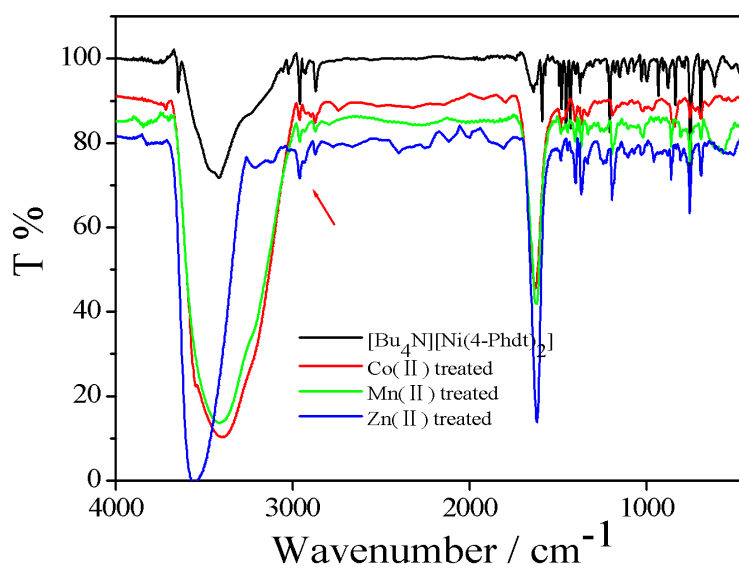

**Figure S9.** FTIR spectra of the metal ion treated films of non coordination  $[\text{n-Bu}_4\text{N}][\text{Ni}(\text{Phdt})_2]$ .

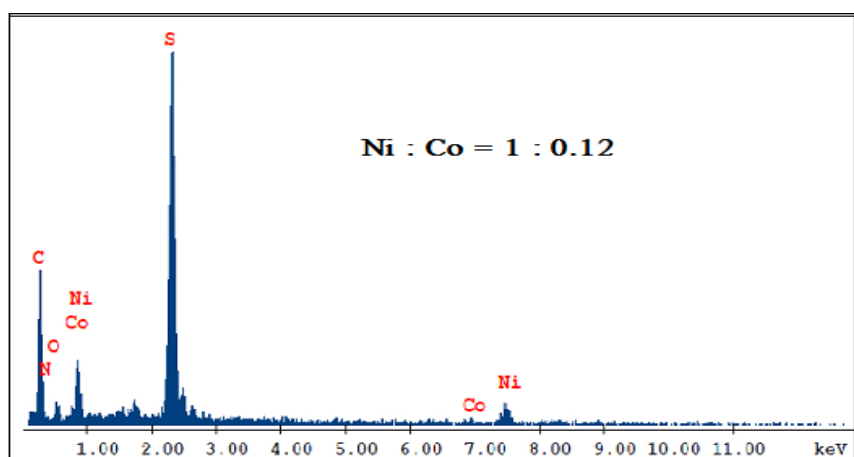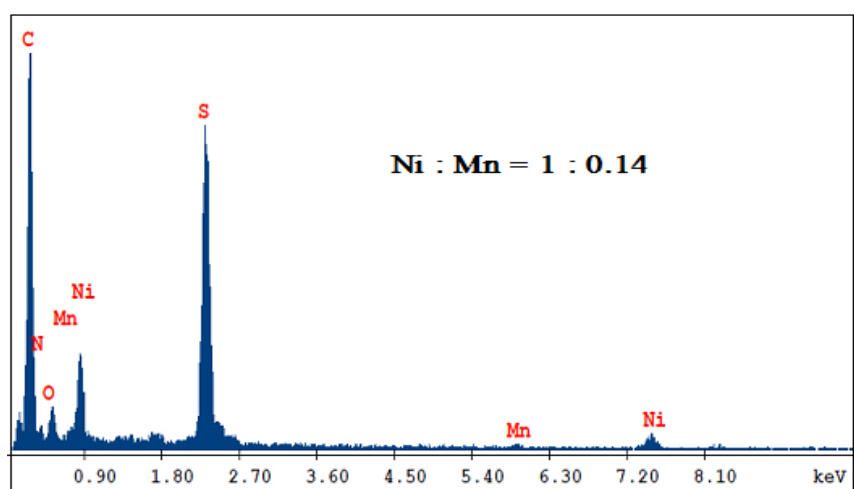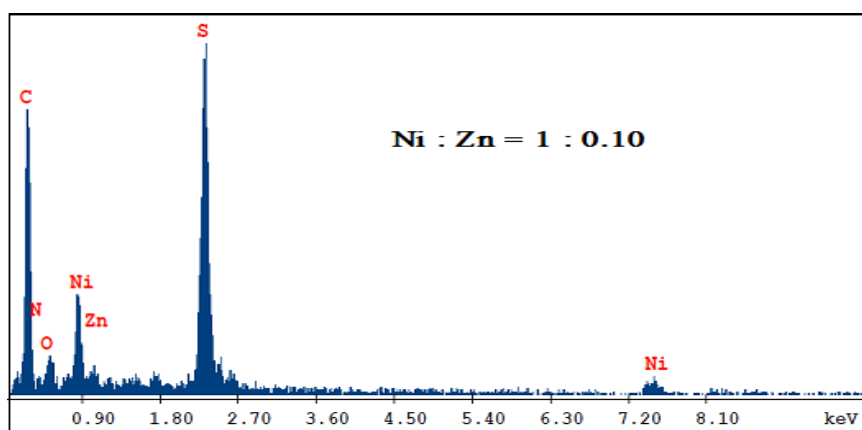

**Figure S10.** EDS results of the metal ions treated film of  $[n\text{-Bu}_4\text{N}][\text{Ni}(\text{Phdt})_2]$ , (a) Mn(II), (b) Co(II), and (c) Zn(II).



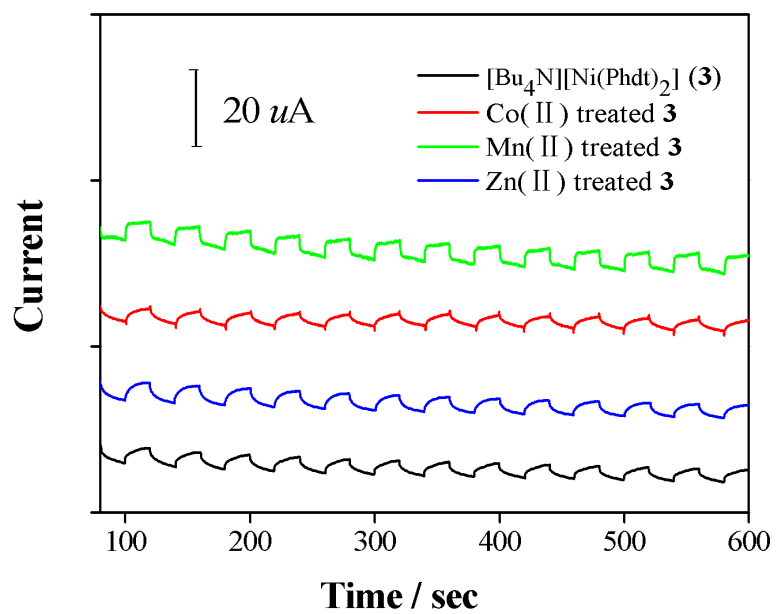

**Figure S11.** Photocurrent responses of **3** and the metal ions treated **3**.
